# Supplementary material
Source: publisher figshare collection journal article supplement (https://gsapubs.figshare.com/ndownloader/files/22759544)
Supplement: Supplementary file 1 [file 22759544]

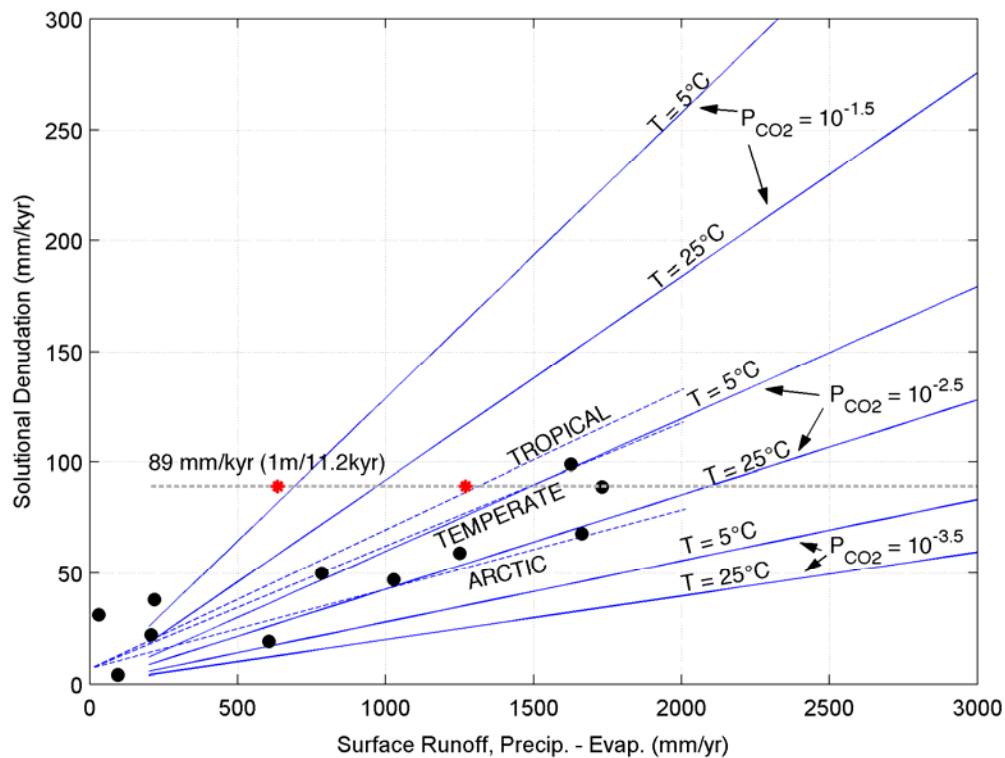

Figure DR1. Plot of solutional denudation rate as a function of surface runoff presented in White (1988). Red data points show estimated from karst-driven isostatic uplift modeling for North Florida conducted in this study for end-member estimates of surface runoff for the region. The rate proposed by our model (1 m/11.2 kyr or 89 mm/kyr) is comparable to the solutional denudation rates in tropical regions.
